# Supplementary material
Source: Springer Nature journal article supplement (https://www.springermedizin.de/resource/supplementary/12903_2014_392_MOESM5_ESM.pdf/9516936)
Supplement: MOESM5 [file 9516936]

**Figure 3 – Overview of 3 key papers identified from literature review**

| <b>Author</b>         | <b>Reference</b> | <b>Country</b> | <b>Research topic</b>                                                             | <b>Methodology</b>                                                                             | <b>Participant group</b>                                                                                                                  | <b>Analysis</b>                                     | <b>Brief overview</b>                                                                                                                                                                                       | <b>Key features</b>                                                                                                                                                                                    |
|-----------------------|------------------|----------------|-----------------------------------------------------------------------------------|------------------------------------------------------------------------------------------------|-------------------------------------------------------------------------------------------------------------------------------------------|-----------------------------------------------------|-------------------------------------------------------------------------------------------------------------------------------------------------------------------------------------------------------------|--------------------------------------------------------------------------------------------------------------------------------------------------------------------------------------------------------|
| Kulich, K. R., et al. | (40)             | Sweden         | Assessment of patient-centred dentistry in dental phobic patients                 | Qualitative approach using semi-structured interviews based on video analysis of consultation. | 30 interviews conducted with 5 dentists working in a clinic treating anxious patients. Based on 2 separate consultations with 15 patients | Grounded theory                                     | Study to ascertain the key features in delivering PCC to anxious patients attending a specialist clinic in Sweden. Model of care developed based on "holistic perception and understanding of the patient." | <ul style="list-style-type: none"> <li>• Communication</li> <li>• Empathy</li> <li>• Understanding</li> <li>• Positive outlook</li> <li>• Patient contact</li> </ul>                                   |
| Loignon, C., et al.   | (41)             | Canada         | Identify effective approaches to providing care for patients living in poverty    | Qualitative approach based on semi-structured interviews                                       | Interviews conducted with 8 dentists with experience of treating patients living in poverty                                               | Thematic analysis                                   | Research to determine what features of PCC are most effective in delivering dental care to people in poverty in Canada. Domains based around socio-humanistic approach.                                     | <ul style="list-style-type: none"> <li>• Understanding</li> <li>• Empathy</li> <li>• Non-judgemental</li> <li>• Overcome social distance</li> <li>• Direct contact</li> <li>• Communication</li> </ul> |
| Scambler, S., et al.  | (42)             | UK             | Assessment of professional attitudes towards disability in special care dentistry | Qualitative approach based on focus groups & semi-structured interviews                        | Sample of 30 participants including dentists and staff working within special care dentistry                                              | Retroductive analysis using a theoretical framework | Study to explore attitudes of staff working in Special Care Dentistry towards disability and provision of dental care. Analysis highlighted importance of PCC and revealed key features.                    | <ul style="list-style-type: none"> <li>• Holistic approach</li> <li>• Individualised care</li> <li>• Information / support</li> <li>• Time</li> <li>• Communication</li> <li>• Trust</li> </ul>        |
